# Supplementary material
Source: publisher figshare collection journal article supplement (https://acs.figshare.com/ndownloader/files/5639553)
Supplement: Supplementary file 1 [file 5639553]

 
data_20160325dbnb1_0m_a 
 
_audit_creation_method            SHELXL-97 
_chemical_name_systematic 
; 
 ? 
; 
_chemical_name_common             ? 
_chemical_melting_point           ? 
_chemical_formula_moiety          ? 
_chemical_formula_sum 
 'C16 H13 N O2 S' 
_chemical_formula_weight          283.33 
 
loop_ 
 _atom_type_symbol 
 _atom_type_description 
 _atom_type_scat_dispersion_real 
 _atom_type_scat_dispersion_imag 
 _atom_type_scat_source 
 'C'  'C'   0.0033   0.0016 
 'International Tables Vol C Tables 4.2.6.8 and 6.1.1.4' 
 'H'  'H'   0.0000   0.0000 
 'International Tables Vol C Tables 4.2.6.8 and 6.1.1.4' 
 'N'  'N'   0.0061   0.0033 
 'International Tables Vol C Tables 4.2.6.8 and 6.1.1.4' 
 'O'  'O'   0.0106   0.0060 
 'International Tables Vol C Tables 4.2.6.8 and 6.1.1.4' 
 'S'  'S'   0.1246   0.1234 
 'International Tables Vol C Tables 4.2.6.8 and 6.1.1.4' 
 
_symmetry_cell_setting           'Monoclinic''
_symmetry_space_group_name_H-M   'P2(1)/c'
 
loop_ 
 _symmetry_equiv_pos_as_xyz 
 'x, y, z' 
 '-x, y+1/2, -z+1/2' 
 '-x, -y, -z' 
 'x, -y-1/2, z-1/2' 
 
_cell_length_a                    9.6089(5) 
_cell_length_b                    9.7376(6) 
_cell_length_c                    14.4701(8) 
_cell_angle_alpha                 90.00 
_cell_angle_beta                  96.693(2) 
_cell_angle_gamma                 90.00 
_cell_volume                      1344.71(13) 
_cell_formula_units_Z             4 
_cell_measurement_temperature     296(2) 
_cell_measurement_reflns_used      7551
_cell_measurement_theta_min        2.53
_cell_measurement_theta_max       27.65
 
_exptl_crystal_description        'block' 
_exptl_crystal_colour             'colorless' 
_exptl_crystal_size_max           0.28 
_exptl_crystal_size_mid           0.26 
_exptl_crystal_size_min           0.22 
_exptl_crystal_density_meas       ? 
_exptl_crystal_density_diffrn     1.400 
_exptl_crystal_density_method     'not measured' 
_exptl_crystal_F_000              592 
_exptl_absorpt_coefficient_mu     0.241 
_exptl_absorpt_correction_type    'multi-scan' 
_exptl_absorpt_correction_T_min   0.9357 
_exptl_absorpt_correction_T_max   0.9490 
_exptl_absorpt_process_details    'sadabs' 
 
_exptl_special_details 
; 
 ? 
; 
 
_diffrn_ambient_temperature       296(2) 
_diffrn_radiation_wavelength      0.71073 
_diffrn_radiation_type            MoK\a 
_diffrn_radiation_source          'fine-focus sealed tube' 
_diffrn_radiation_monochromator   graphite 
_diffrn_measurement_device_type  'Bruker APEX-II CCD'
_diffrn_measurement_method       '\f and \w scans'
_diffrn_detector_area_resol_mean  ? 
_diffrn_reflns_number             9647 
_diffrn_reflns_av_R_equivalents   0.0206 
_diffrn_reflns_av_sigmaI/netI     0.0191 
_diffrn_reflns_limit_h_min        -11 
_diffrn_reflns_limit_h_max        11 
_diffrn_reflns_limit_k_min        -11 
_diffrn_reflns_limit_k_max        11 
_diffrn_reflns_limit_l_min        -17 
_diffrn_reflns_limit_l_max        15 
_diffrn_reflns_theta_min          2.53 
_diffrn_reflns_theta_max          25.49 
_reflns_number_total              2482 
_reflns_number_gt                 2285 
_reflns_threshold_expression      >2sigma(I) 
 
_computing_data_collection       'Bruker APEX2'
_computing_cell_refinement       'Bruker SAINT'
_computing_data_reduction        'Bruker SAINT'
_computing_structure_solution     'SHELXS-97 (Sheldrick, 2008)' 
_computing_structure_refinement   'SHELXL-97 (Sheldrick, 2008)' 
_computing_molecular_graphics    'Bruker SHELXTL'
_computing_publication_material  'Bruker SHELXTL'
 
_refine_special_details 
; 
 Refinement of F^2^ against ALL reflections.  The weighted R-factor wR and 
 goodness of fit S are based on F^2^, conventional R-factors R are based 
 on F, with F set to zero for negative F^2^. The threshold expression of 
 F^2^ > 2sigma(F^2^) is used only for calculating R-factors(gt) etc. and is 
 not relevant to the choice of reflections for refinement.  R-factors based 
 on F^2^ are statistically about twice as large as those based on F, and R- 
 factors based on ALL data will be even larger. 
; 
 
_refine_ls_structure_factor_coef  Fsqd  
_refine_ls_matrix_type            full 
_refine_ls_weighting_scheme       calc  
_refine_ls_weighting_details 
 'calc w=1/[\s^2^(Fo^2^)+(0.0386P)^2^+0.8169P] where P=(Fo^2^+2Fc^2^)/3' 
_atom_sites_solution_primary      direct 
_atom_sites_solution_secondary    difmap 
_atom_sites_solution_hydrogens    geom 
_refine_ls_hydrogen_treatment     mixed 
_refine_ls_extinction_method      none 
_refine_ls_extinction_coef        ? 
_refine_ls_number_reflns          2482 
_refine_ls_number_parameters      182 
_refine_ls_number_restraints      0 
_refine_ls_R_factor_all           0.0354 
_refine_ls_R_factor_gt            0.0319 
_refine_ls_wR_factor_ref          0.0846 
_refine_ls_wR_factor_gt           0.0825 
_refine_ls_goodness_of_fit_ref    1.044 
_refine_ls_restrained_S_all       1.044 
_refine_ls_shift/su_max           0.001 
_refine_ls_shift/su_mean          0.000 
 
loop_ 
 _atom_site_label 
 _atom_site_type_symbol 
 _atom_site_fract_x 
 _atom_site_fract_y 
 _atom_site_fract_z 
 _atom_site_U_iso_or_equiv 
 _atom_site_adp_type 
 _atom_site_occupancy 
 _atom_site_symmetry_multiplicity 
 _atom_site_calc_flag 
 _atom_site_refinement_flags 
 _atom_site_disorder_assembly 
 _atom_site_disorder_group 
C1 C 0.62691(15) 0.56618(16) 0.17857(10) 0.0202(3) Uani 1 1 d . . . 
C2 C 0.52634(16) 0.66823(16) 0.17584(11) 0.0241(3) Uani 1 1 d . . . 
H2 H 0.5496 0.7557 0.1983 0.029 Uiso 1 1 calc R . . 
C3 C 0.39028(16) 0.63771(17) 0.13900(11) 0.0266(3) Uani 1 1 d . . . 
H3 H 0.3228 0.7066 0.1354 0.032 Uiso 1 1 calc R . . 
C4 C 0.35204(16) 0.50668(17) 0.10734(10) 0.0243(3) Uani 1 1 d . . . 
C5 C 0.45533(18) 0.40619(18) 0.11146(12) 0.0312(4) Uani 1 1 d . . . 
H5 H 0.4317 0.3178 0.0909 0.037 Uiso 1 1 calc R . . 
C6 C 0.59273(17) 0.43540(18) 0.14559(12) 0.0305(4) Uani 1 1 d . . . 
H6 H 0.6614 0.3680 0.1464 0.037 Uiso 1 1 calc R . . 
C7 C 0.20296(17) 0.4731(2) 0.07069(12) 0.0355(4) Uani 1 1 d . . . 
H7A H 0.1801 0.5152 0.0109 0.053 Uiso 1 1 calc R . . 
H7B H 0.1413 0.5073 0.1130 0.053 Uiso 1 1 calc R . . 
H7C H 0.1924 0.3753 0.0648 0.053 Uiso 1 1 calc R . . 
C8 C 0.82475(15) 0.50498(15) 0.33218(10) 0.0193(3) Uani 1 1 d . . . 
C9 C 0.92567(15) 0.39978(15) 0.34277(10) 0.0216(3) Uani 1 1 d . . . 
H9 H 0.9767 0.3753 0.2945 0.026 Uiso 1 1 calc R . . 
C10 C 0.94538(15) 0.33509(15) 0.42724(11) 0.0222(3) Uani 1 1 d . . . 
H10 H 1.0108 0.2647 0.4374 0.027 Uiso 1 1 calc R . . 
C11 C 0.86610(15) 0.37559(15) 0.49892(10) 0.0198(3) Uani 1 1 d . . . 
C12 C 0.88419(16) 0.31773(16) 0.58949(11) 0.0246(3) Uani 1 1 d . . . 
H12 H 0.9484 0.2471 0.6032 0.030 Uiso 1 1 calc R . . 
C13 C 0.80779(18) 0.36531(17) 0.65655(11) 0.0275(4) Uani 1 1 d . . . 
H13 H 0.8224 0.3286 0.7162 0.033 Uiso 1 1 calc R . . 
C14 C 0.70694(18) 0.46951(17) 0.63646(11) 0.0299(4) Uani 1 1 d . . . 
H14 H 0.6545 0.4995 0.6827 0.036 Uiso 1 1 calc R . . 
C15 C 0.68547(17) 0.52694(17) 0.54975(11) 0.0269(4) Uani 1 1 d . . . 
H15 H 0.6182 0.5952 0.5370 0.032 Uiso 1 1 calc R . . 
C16 C 0.76569(15) 0.48243(15) 0.47949(10) 0.0204(3) Uani 1 1 d . . . 
N1 N 0.74569(13) 0.54650(13) 0.39473(8) 0.0216(3) Uani 1 1 d . . . 
O1 O 0.81328(12) 0.74433(12) 0.24737(8) 0.0317(3) Uani 1 1 d . . . 
O2 O 0.89480(11) 0.54099(14) 0.16549(8) 0.0338(3) Uani 1 1 d . . . 
S1 S 0.80111(4) 0.60072(4) 0.22515(2) 0.02273(13) Uani 1 1 d . . . 
 
loop_ 
 _atom_site_aniso_label 
 _atom_site_aniso_U_11 
 _atom_site_aniso_U_22 
 _atom_site_aniso_U_33 
 _atom_site_aniso_U_23 
 _atom_site_aniso_U_13 
 _atom_site_aniso_U_12 
C1 0.0183(7) 0.0258(8) 0.0165(7) 0.0021(6) 0.0016(5) -0.0005(6) 
C2 0.0262(8) 0.0214(8) 0.0249(8) 0.0021(6) 0.0043(6) 0.0009(6) 
C3 0.0225(8) 0.0296(9) 0.0278(8) 0.0058(7) 0.0041(6) 0.0070(7) 
C4 0.0213(8) 0.0361(9) 0.0154(7) 0.0049(6) 0.0024(6) -0.0017(7) 
C5 0.0304(9) 0.0277(9) 0.0343(9) -0.0068(7) -0.0021(7) -0.0014(7) 
C6 0.0247(8) 0.0280(9) 0.0377(9) -0.0043(7) -0.0017(7) 0.0073(7) 
C7 0.0238(8) 0.0501(11) 0.0312(9) 0.0035(8) -0.0023(7) -0.0049(8) 
C8 0.0171(7) 0.0219(7) 0.0185(7) 0.0001(6) -0.0002(5) -0.0034(6) 
C9 0.0178(7) 0.0225(8) 0.0244(8) -0.0058(6) 0.0025(6) -0.0034(6) 
C10 0.0179(7) 0.0171(7) 0.0303(8) -0.0023(6) -0.0019(6) -0.0004(6) 
C11 0.0186(7) 0.0162(7) 0.0235(7) -0.0011(6) -0.0026(6) -0.0057(6) 
C12 0.0246(8) 0.0187(8) 0.0286(8) 0.0041(6) -0.0048(6) -0.0042(6) 
C13 0.0353(9) 0.0253(8) 0.0208(8) 0.0047(6) -0.0015(6) -0.0081(7) 
C14 0.0392(9) 0.0281(9) 0.0237(8) -0.0008(6) 0.0093(7) -0.0024(7) 
C15 0.0305(8) 0.0246(8) 0.0264(8) 0.0015(6) 0.0063(6) 0.0037(7) 
C16 0.0204(7) 0.0194(7) 0.0209(7) 0.0005(6) 0.0000(6) -0.0033(6) 
N1 0.0206(6) 0.0232(7) 0.0207(6) 0.0015(5) 0.0012(5) 0.0010(5) 
O1 0.0319(6) 0.0300(6) 0.0319(6) 0.0079(5) -0.0021(5) -0.0101(5) 
O2 0.0217(6) 0.0576(8) 0.0231(6) 0.0040(5) 0.0062(4) 0.0026(5) 
S1 0.0182(2) 0.0304(2) 0.0195(2) 0.00388(14) 0.00179(14) -0.00258(15) 
 
_geom_special_details 
; 
 All esds (except the esd in the dihedral angle between two l.s. planes) 
 are estimated using the full covariance matrix.  The cell esds are taken 
 into account individually in the estimation of esds in distances, angles 
 and torsion angles; correlations between esds in cell parameters are only 
 used when they are defined by crystal symmetry.  An approximate (isotropic) 
 treatment of cell esds is used for estimating esds involving l.s. planes. 
; 
 
loop_ 
 _geom_bond_atom_site_label_1 
 _geom_bond_atom_site_label_2 
 _geom_bond_distance 
 _geom_bond_site_symmetry_2 
 _geom_bond_publ_flag 
C1 C2 1.383(2) . ? 
C1 C6 1.386(2) . ? 
C1 S1 1.7625(15) . ? 
C2 C3 1.385(2) . ? 
C2 H2 0.9300 . ? 
C3 C4 1.390(2) . ? 
C3 H3 0.9300 . ? 
C4 C5 1.390(2) . ? 
C4 C7 1.504(2) . ? 
C5 C6 1.384(2) . ? 
C5 H5 0.9300 . ? 
C6 H6 0.9300 . ? 
C7 H7A 0.9600 . ? 
C7 H7B 0.9600 . ? 
C7 H7C 0.9600 . ? 
C8 N1 1.3115(19) . ? 
C8 C9 1.407(2) . ? 
C8 S1 1.7994(15) . ? 
C9 C10 1.369(2) . ? 
C9 H9 0.9300 . ? 
C10 C11 1.413(2) . ? 
C10 H10 0.9300 . ? 
C11 C12 1.419(2) . ? 
C11 C16 1.424(2) . ? 
C12 C13 1.364(2) . ? 
C12 H12 0.9300 . ? 
C13 C14 1.410(2) . ? 
C13 H13 0.9300 . ? 
C14 C15 1.367(2) . ? 
C14 H14 0.9300 . ? 
C15 C16 1.414(2) . ? 
C15 H15 0.9300 . ? 
C16 N1 1.3694(19) . ? 
O1 S1 1.4366(13) . ? 
O2 S1 1.4406(12) . ? 
 
loop_ 
 _geom_angle_atom_site_label_1 
 _geom_angle_atom_site_label_2 
 _geom_angle_atom_site_label_3 
 _geom_angle 
 _geom_angle_site_symmetry_1 
 _geom_angle_site_symmetry_3 
 _geom_angle_publ_flag 
C2 C1 C6 120.90(14) . . ? 
C2 C1 S1 120.19(12) . . ? 
C6 C1 S1 118.91(12) . . ? 
C1 C2 C3 118.79(15) . . ? 
C1 C2 H2 120.6 . . ? 
C3 C2 H2 120.6 . . ? 
C2 C3 C4 121.66(15) . . ? 
C2 C3 H3 119.2 . . ? 
C4 C3 H3 119.2 . . ? 
C5 C4 C3 118.16(14) . . ? 
C5 C4 C7 120.51(16) . . ? 
C3 C4 C7 121.33(15) . . ? 
C6 C5 C4 121.14(16) . . ? 
C6 C5 H5 119.4 . . ? 
C4 C5 H5 119.4 . . ? 
C5 C6 C1 119.31(15) . . ? 
C5 C6 H6 120.3 . . ? 
C1 C6 H6 120.3 . . ? 
C4 C7 H7A 109.5 . . ? 
C4 C7 H7B 109.5 . . ? 
H7A C7 H7B 109.5 . . ? 
C4 C7 H7C 109.5 . . ? 
H7A C7 H7C 109.5 . . ? 
H7B C7 H7C 109.5 . . ? 
N1 C8 C9 126.64(13) . . ? 
N1 C8 S1 114.15(11) . . ? 
C9 C8 S1 119.17(11) . . ? 
C10 C9 C8 117.02(14) . . ? 
C10 C9 H9 121.5 . . ? 
C8 C9 H9 121.5 . . ? 
C9 C10 C11 119.79(14) . . ? 
C9 C10 H10 120.1 . . ? 
C11 C10 H10 120.1 . . ? 
C10 C11 C12 123.29(14) . . ? 
C10 C11 C16 118.02(13) . . ? 
C12 C11 C16 118.67(14) . . ? 
C13 C12 C11 120.27(15) . . ? 
C13 C12 H12 119.9 . . ? 
C11 C12 H12 119.9 . . ? 
C12 C13 C14 120.78(14) . . ? 
C12 C13 H13 119.6 . . ? 
C14 C13 H13 119.6 . . ? 
C15 C14 C13 120.68(15) . . ? 
C15 C14 H14 119.7 . . ? 
C13 C14 H14 119.7 . . ? 
C14 C15 C16 119.86(15) . . ? 
C14 C15 H15 120.1 . . ? 
C16 C15 H15 120.1 . . ? 
N1 C16 C15 118.23(14) . . ? 
N1 C16 C11 122.05(13) . . ? 
C15 C16 C11 119.71(13) . . ? 
C8 N1 C16 116.45(13) . . ? 
O1 S1 O2 119.14(8) . . ? 
O1 S1 C1 108.68(7) . . ? 
O2 S1 C1 109.01(7) . . ? 
O1 S1 C8 108.24(7) . . ? 
O2 S1 C8 106.35(7) . . ? 
C1 S1 C8 104.43(7) . . ? 
 
loop_ 
 _geom_torsion_atom_site_label_1 
 _geom_torsion_atom_site_label_2 
 _geom_torsion_atom_site_label_3 
 _geom_torsion_atom_site_label_4 
 _geom_torsion 
 _geom_torsion_site_symmetry_1 
 _geom_torsion_site_symmetry_2 
 _geom_torsion_site_symmetry_3 
 _geom_torsion_site_symmetry_4 
 _geom_torsion_publ_flag 
C6 C1 C2 C3 -0.3(2) . . . . ? 
S1 C1 C2 C3 -179.85(11) . . . . ? 
C1 C2 C3 C4 1.8(2) . . . . ? 
C2 C3 C4 C5 -1.5(2) . . . . ? 
C2 C3 C4 C7 177.72(14) . . . . ? 
C3 C4 C5 C6 -0.3(2) . . . . ? 
C7 C4 C5 C6 -179.56(16) . . . . ? 
C4 C5 C6 C1 1.8(3) . . . . ? 
C2 C1 C6 C5 -1.5(2) . . . . ? 
S1 C1 C6 C5 178.07(13) . . . . ? 
N1 C8 C9 C10 -1.0(2) . . . . ? 
S1 C8 C9 C10 176.40(11) . . . . ? 
C8 C9 C10 C11 -0.2(2) . . . . ? 
C9 C10 C11 C12 -177.34(14) . . . . ? 
C9 C10 C11 C16 1.0(2) . . . . ? 
C10 C11 C12 C13 177.47(14) . . . . ? 
C16 C11 C12 C13 -0.8(2) . . . . ? 
C11 C12 C13 C14 1.9(2) . . . . ? 
C12 C13 C14 C15 -1.3(3) . . . . ? 
C13 C14 C15 C16 -0.5(3) . . . . ? 
C14 C15 C16 N1 -177.14(14) . . . . ? 
C14 C15 C16 C11 1.5(2) . . . . ? 
C10 C11 C16 N1 -0.7(2) . . . . ? 
C12 C11 C16 N1 177.73(13) . . . . ? 
C10 C11 C16 C15 -179.26(14) . . . . ? 
C12 C11 C16 C15 -0.9(2) . . . . ? 
C9 C8 N1 C16 1.4(2) . . . . ? 
S1 C8 N1 C16 -176.20(10) . . . . ? 
C15 C16 N1 C8 178.17(13) . . . . ? 
C11 C16 N1 C8 -0.5(2) . . . . ? 
C2 C1 S1 O1 -5.14(14) . . . . ? 
C6 C1 S1 O1 175.32(12) . . . . ? 
C2 C1 S1 O2 -136.46(12) . . . . ? 
C6 C1 S1 O2 44.01(15) . . . . ? 
C2 C1 S1 C8 110.20(13) . . . . ? 
C6 C1 S1 C8 -69.34(14) . . . . ? 
N1 C8 S1 O1 51.12(13) . . . . ? 
C9 C8 S1 O1 -126.64(12) . . . . ? 
N1 C8 S1 O2 -179.76(11) . . . . ? 
C9 C8 S1 O2 2.48(14) . . . . ? 
N1 C8 S1 C1 -64.54(12) . . . . ? 
C9 C8 S1 C1 117.70(12) . . . . ? 
 
_diffrn_measured_fraction_theta_max    0.993 
_diffrn_reflns_theta_full              25.49 
_diffrn_measured_fraction_theta_full   0.993 
_refine_diff_density_max    0.330 
_refine_diff_density_min   -0.330 
_refine_diff_density_rms    0.041 
